# Supplementary material for: The Sensitivity of a Hexagonal Au Nanohole Array under Different Incident Angles
Source: MDPI journal article supplement (doi:10.3390/bios13060654), 2023-06-15
Supplement: s1 [file s1]

---

*Supplementary Materials*

# **The Sensitivity Research of a Hexagonal Au Nanohole Array Under Different Incident Angle**

**Kang Yang\* and Meiyang Li**

School of Physics and Optoelectronic Engineering, Yangtze University, Jingzhou 434023, China.

\*Email address: kangyang@yangtzeu.edu.cn

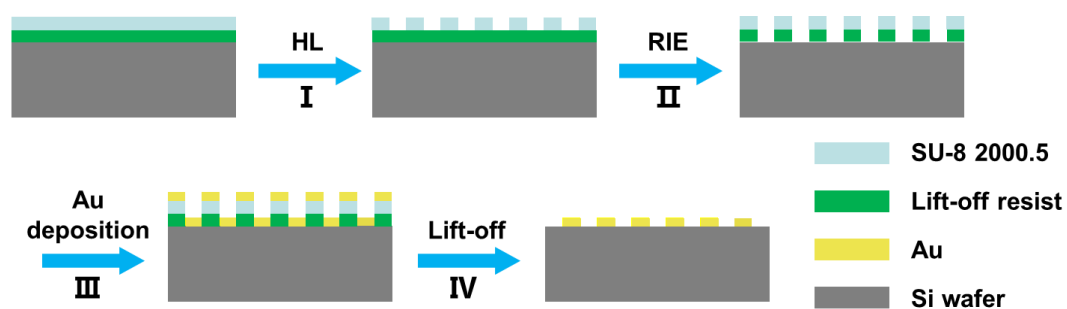

**Figure S1.** Preparation procedure of the Au nanohole array. (I) Holographic lithography (HL). (II) Reactive-ion etching (RIE). (III) Au deposition. (IV) Lift-off process.

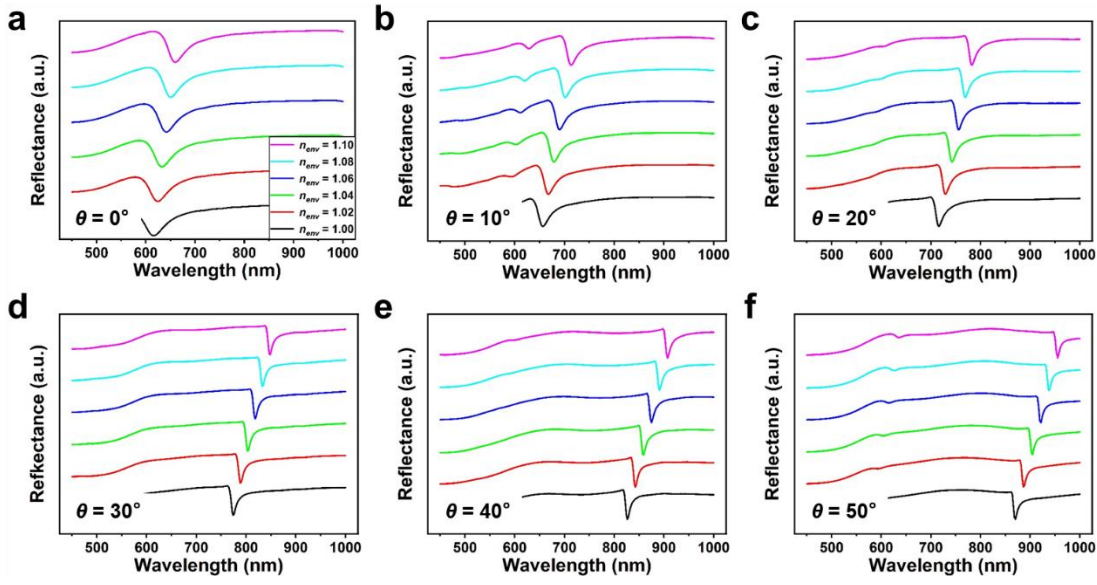

**Figure S2.** The reflectance spectra of the Au nanohole array when  $n_{env}$  increases from 1.00 to 1.10 with a step of 0.02. From (a) to (f),  $\theta$  is  $0^\circ$ ,  $10^\circ$ ,  $20^\circ$ ,  $30^\circ$ ,  $40^\circ$  and  $50^\circ$ , respectively.

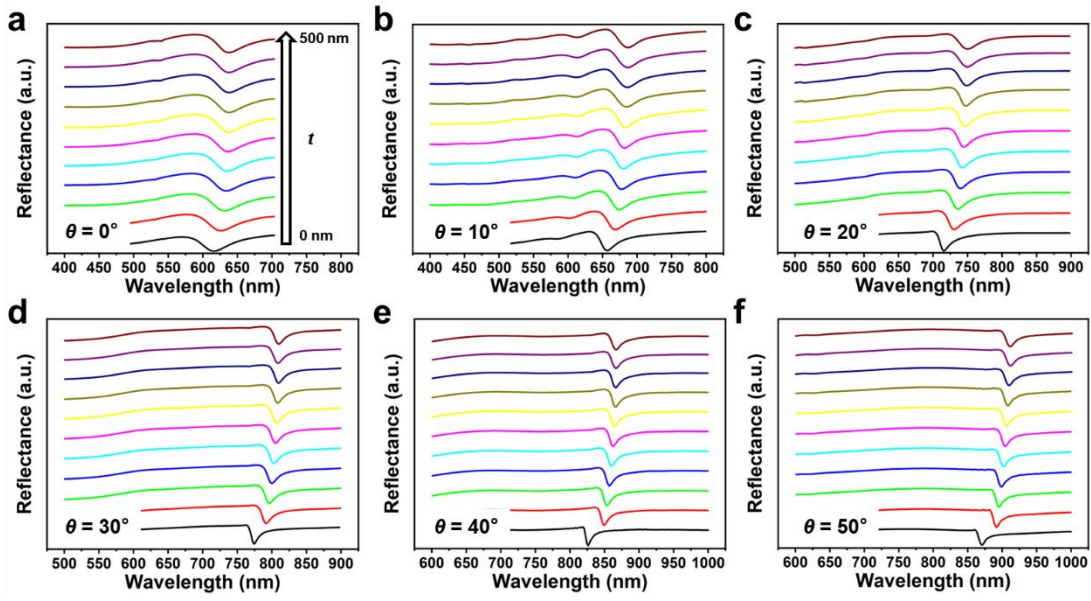

**Figure S3.** The reflectance spectra of the Au nanohole array when  $t$  increases from 0 nm to 500 nm with a step of 50 nm. From (a) to (f),  $\theta$  is 0°, 10°, 20°, 30°, 40° and 50°, respectively.

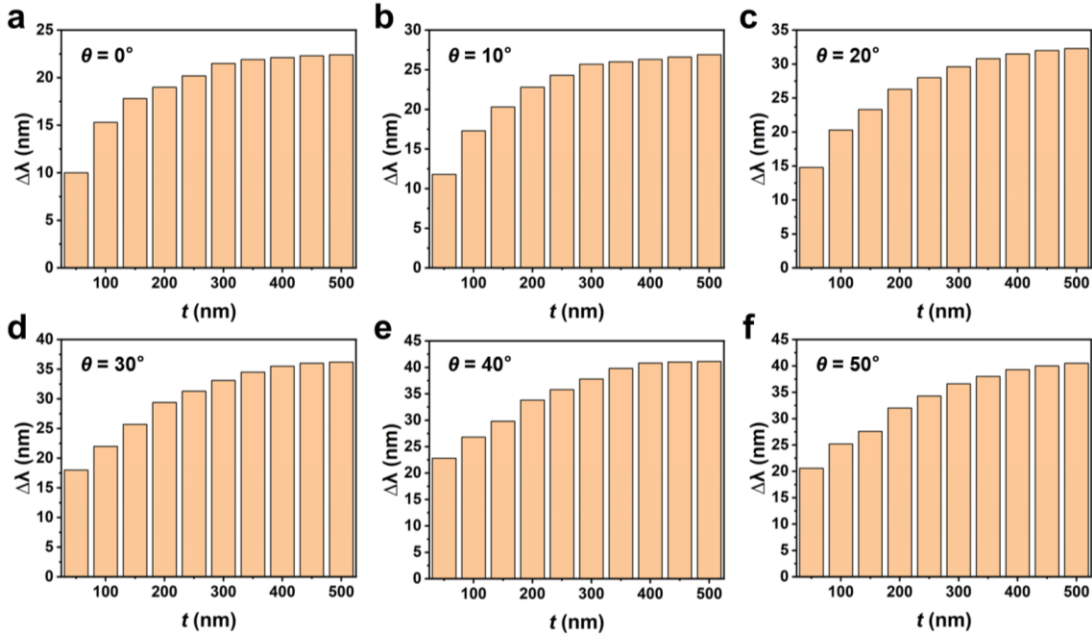

**Figure S4.**  $\Delta\lambda$  of the Au nanohole array when  $t$  increases from 0 nm to 500 nm with a step of 50 nm. From (a) to (f),  $\theta$  is  $0^\circ$ ,  $10^\circ$ ,  $20^\circ$ ,  $30^\circ$ ,  $40^\circ$  and  $50^\circ$ , respectively.  $n_{env}=1.00$ .
